# Supplementary material for: Amino functional SBA-15 assisted NU-1000 for the rapid and efficient adsorption of tetracycline antibiotics
Source: Royal Society of Chemistry journal article supplement (doi:10.1039/d4nj03736g), 2024-01-01
Supplement: d4nj03736g1.pdf [file d4nj03736g1.pdf]

## **Amino functional SBA-15 assisted NU-1000 for rapid and efficient adsorption of tetracycline antibiotics**

Jiawei Yang, Junfei Wu, Lina Gao, Long-Hui Duan and Jing Wang\*

School of Chemistry and Chemical Engineering, Guangxi University, Nanning 530004, PR China

E-mail: [wjwyj82@gxu.edu.cn](mailto:wjwyj82@gxu.edu.cn) (J. Wang)

### **Part 1. Experimental section**

#### **1.1 Chemicals**

SBA-15 was purchased from Nanjing XFNANO Materials Technology Co. (China), 1,3,6,8-Tetra(4-carboxyphenyl) pyrene (H<sub>4</sub>TBAPy) and zirconium (IV) oxychloride octahydrate (ZrOCl<sub>2</sub>·8H<sub>2</sub>O) were purchased from Aladdin Industrial Co. Ltd. Tetracycline (TC), oxytetracycline (OTC), chlortetracycline (CTC), aclacinomycin (ACL), penicillin (PEG), streptomycin sulfate (STR), sulfachlorpyridazine (SCP), sulfamethoxypyridazine (SMP), sulfamerazine (SMR) were purchased from Sigma-Aldrich. All of the other chemicals were purchased from commercial suppliers and utilized without purifying.

#### **1.2 Characterizations**

Scanning electron microscopy (SEM) images were taken by Czech Republic Tescan mira. Transmission electron microscopy (TEM) was measured by Japan JEM-2100F. Powder X-ray diffraction (PXRD) and small-angle X-ray diffraction (SAXRD) were scanned on a Japan Smartlab 9X Advance X-ray diffractometer. Thermogravimetric analysis (TGA) was carried out by America Perkin-Elmer STA8000. The N<sub>2</sub> sorption isotherms were obtained by an America Micrometrics ASAP 2460 surface area analyzer. Fourier transform infrared (FT-IR) spectra were recorded on an America Perkin-Elmer Spectrum 100. The X-ray photoelectron

spectroscopy (XPS) was measured using America Thermo Scientific K-Alpha. Ultraviolet-visible spectroscopy (UV–Vis) was performed using Shanghai UV-1901 spectrometer. The zeta potential was measured by ZEN 3600 Malvern Zetasizer Nano analyzer.

## Part 2. Tables

**Table S1.** Kinetic model parameters for the adsorption of TC on SBA-15@NU-1000

| Models                    | Parameters                                     | TC              | OTC             | CTC              |
|---------------------------|------------------------------------------------|-----------------|-----------------|------------------|
| Pseudo-first-order model  | $Q_e$ (mg·g <sup>-1</sup> )                    | 83.1 ± 1.0      | 82.6 ± 0.8      | 87.3 ± 0.5       |
|                           | $k_1$ (min <sup>-1</sup> )                     | 1.105 ± 0.129   | 0.882 ± 0.073   | 1.636 ± 0.119    |
|                           | R <sup>2</sup>                                 | 0.9502          | 0.96919         | 0.98812          |
| Pseudo-second-order model | $Q_e$ (mg·g <sup>-1</sup> )                    | 84.9 ± 0.4      | 84.4 ± 0.1      | 88.4 ± 0.2       |
|                           | $k_2$ (mg·g <sup>-1</sup> ·min <sup>-1</sup> ) | 0.0274 ± 0.0021 | 0.0218 ± 0.0004 | 0.0601 ± 0.0043  |
|                           | R <sup>2</sup>                                 | 0.9924          | 0.9994          | 0.9967           |
| Elovich model             | $\alpha$                                       | 6.381E6 ± 1.798 | 1.717E8 ± 4.153 | 4.119E12 ± 2.719 |
|                           | $\beta$                                        | 0.308 ± 0.036   | 0.266 ± 0.032   | 0.531 ± 0.078    |
|                           | R <sup>2</sup>                                 | 0.9744          | 0.9649          | 0.9869           |
| Weber-Morris model        | $k_{i1}$                                       | 8.81 ± 0.23     | 15.83 ± 1.29    | 9.81 ± 0.56      |
|                           | $C_{i1}$                                       | 55.66 ± 1.36    | 41.93 ± 2.24    | 64.13 ± 0.98     |
|                           | R <sup>2</sup>                                 | 0.9971          | 0.9776          | 0.9848           |
|                           | $k_{i2}$                                       | 0.08 ± 0.01     | 0.24 ± 0.07     | 0.09 ± 0.03      |
|                           | $C_{i2}$                                       | 83.92 ± 2.71    | 81.04 ± 0.79    | 87.29 ± 0.34     |
|                           | R <sup>2</sup>                                 | 0.9966          | 0.9734          | 0.9819           |

**Table S2.** Isotherm parameters for the adsorption of TC on SBA-15@NU-1000

| Models              | Parameters                                                       | TC            | OTC           | CTC           |
|---------------------|------------------------------------------------------------------|---------------|---------------|---------------|
| Langmuir isotherm   | $Q_m$ (mg·g <sup>-1</sup> )                                      | 281.3 ± 30.5  | 357.0 ± 11.9  | 497.1 ± 42.0  |
|                     | b (L·mg <sup>-1</sup> )                                          | 0.130 ± 0.05  | 0.079 ± 0.008 | 0.215 ± 0.059 |
|                     | R <sup>2</sup>                                                   | 0.9278        | 0.9706        | 0.9311        |
| Freundlich isotherm | $K_f$ (mg <sup>1-1/n</sup> ·L <sup>-1/n</sup> ·g <sup>-1</sup> ) | 60.8 ± 6.9    | 59.1 ± 5.8    | 142.2 ± 3.9   |
|                     | n                                                                | 2.60 ± 0.25   | 2.45 ± 0.17   | 2.94 ± 0.08   |
|                     | R <sup>2</sup>                                                   | 0.9735        | 0.9798        | 0.9964        |
| Sips isotherm       | $Q_m$ (mg·g <sup>-1</sup> )                                      | 424.2 ± 33.7  | 450.7 ± 26.9  | 526.3 ± 51.8  |
|                     | $b_s$ (mg <sup>-1/n</sup> ·L <sup>-1/n</sup> )                   | 0.103 ± 0.018 | 0.042 ± 0.007 | 0.148 ± 0.063 |
|                     | n                                                                | 0.44 ± 0.12   | 0.75 ± 0.04   | 0.37 ± 0.06   |
|                     | R <sup>2</sup>                                                   | 0.9682        | 0.9987        | 0.9962        |
| Temkin isotherm     | $a_T$ (L·g <sup>-1</sup> )                                       | 2621 ± 407    | 1047 ± 134    | 2023 ± 312    |
|                     | $b_T$ (kJ·mol <sup>-1</sup> )                                    | 0.049 ± 0.006 | 0.071 ± 0.003 | 0.061 ± 0.009 |
|                     | R <sup>2</sup>                                                   | 0.9323        | 0.9871        | 0.8631        |

### Part 3. Figures

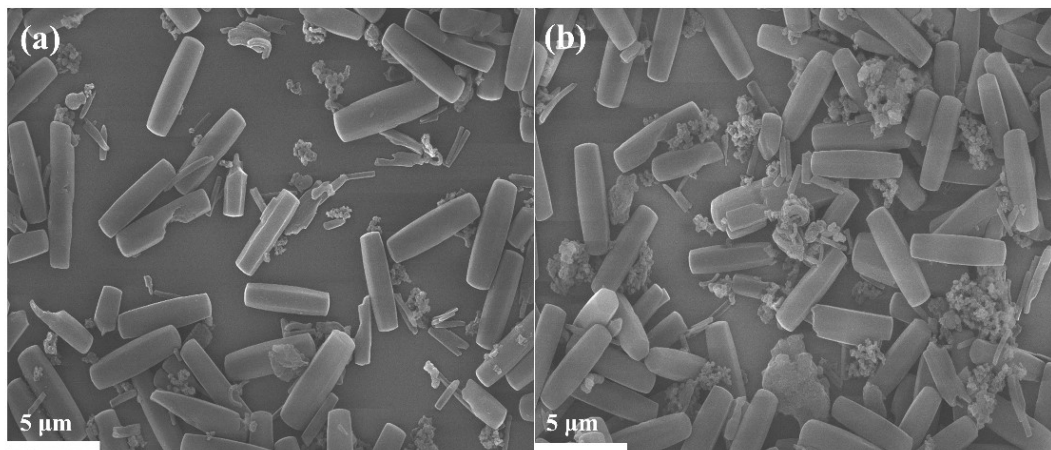

**Fig. S1** SEM images showing the physical mixture of SBA-15 and NU-1000.

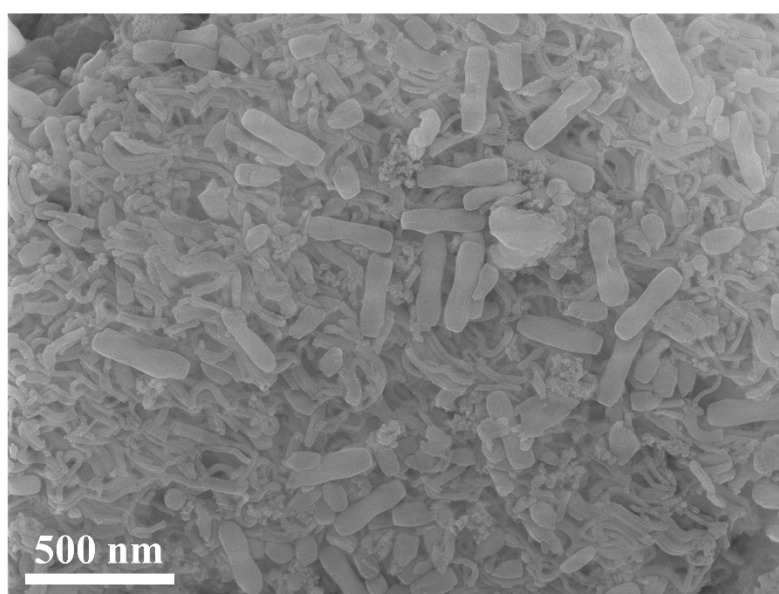

**Fig. S2** SEM image of 0.25-SBA-15@NU-1000.

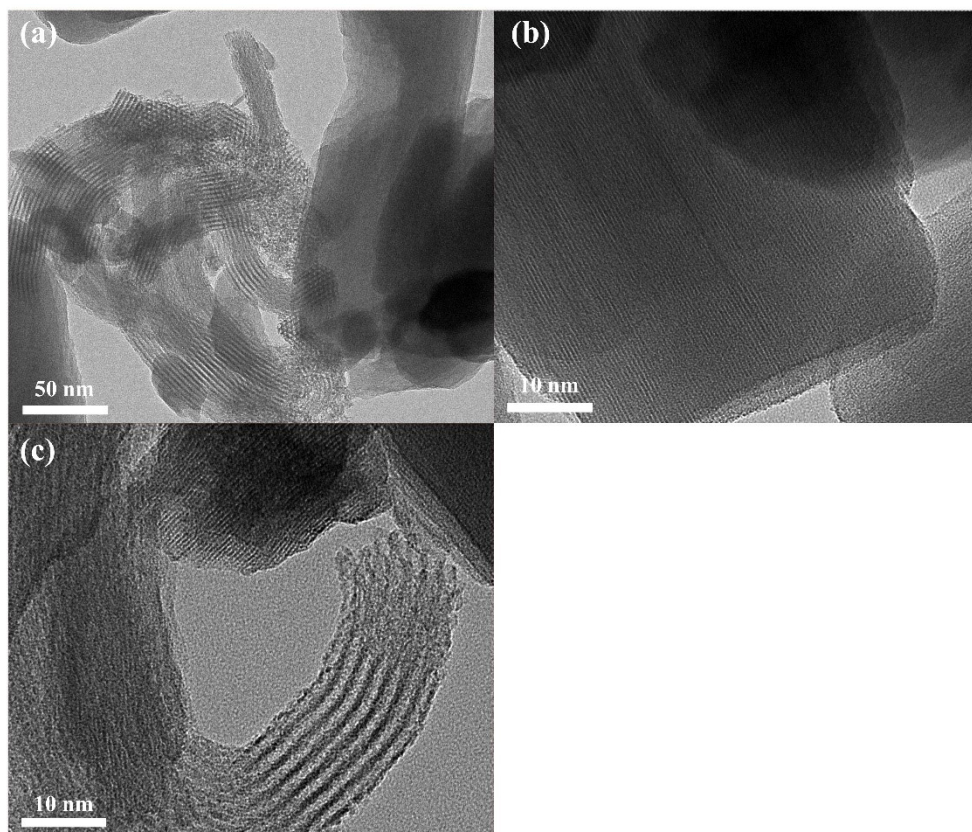

**Fig. S3** High-resolution TEM images of 0.2-SBA-15@NU-1000.

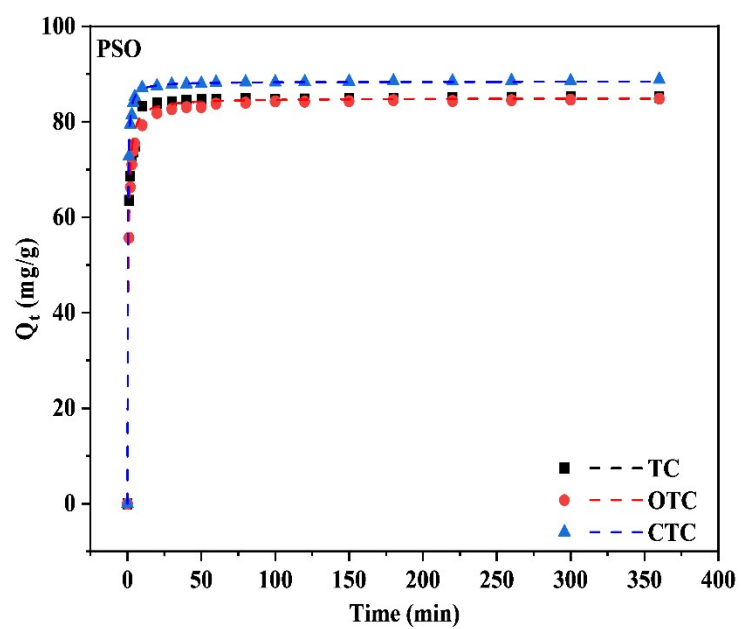

**Fig. S4** Adsorption kinetics of TCs on SBA-15@NU-1000 fitted by nonlinear PSO model.

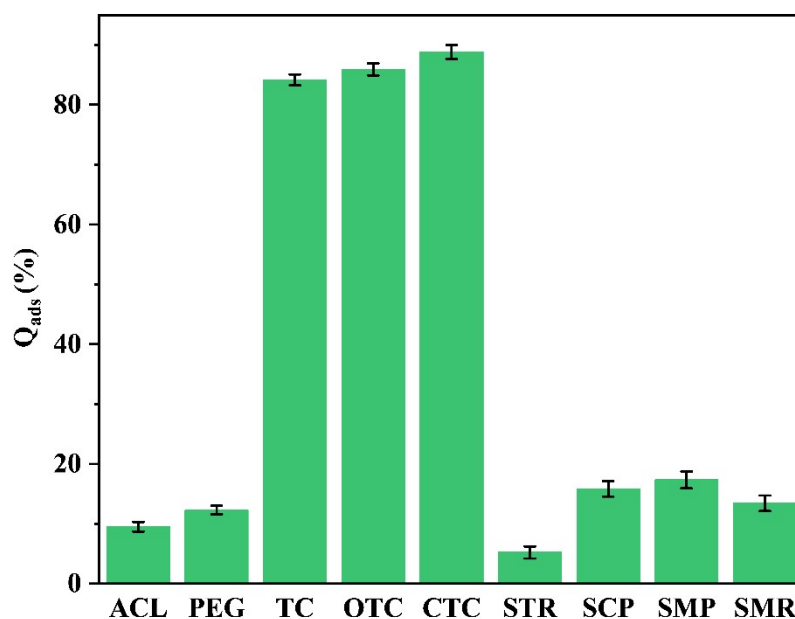

**Fig. S5** Removal efficiency ( $Q_{ads}$  (%)) of SBA-15@NU-1000 toward various antibiotics (5 mg of SBA-15@NU-1000, 40 mg/L of the investigated antibiotics).

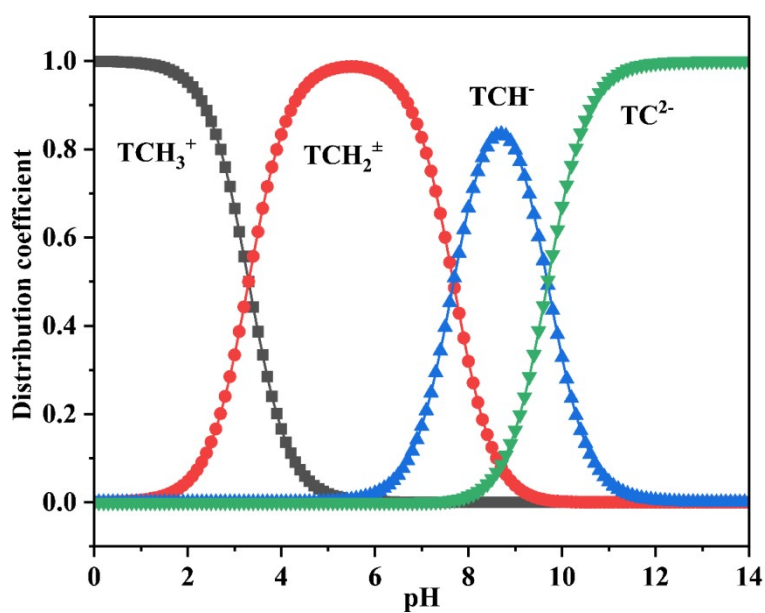

**Fig. S6** Distribution plotting curve of TC at different pH.

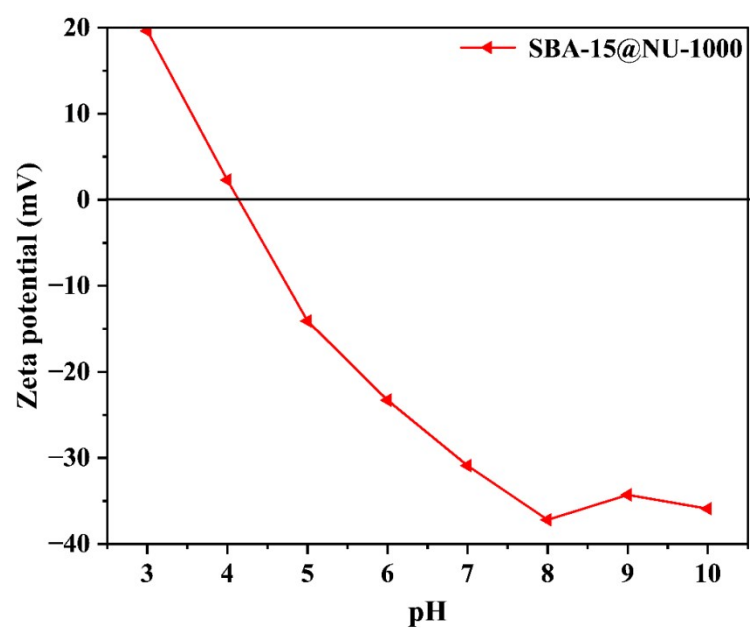

**Fig. S7** Zeta potential values of SBA-15@NU-1000 at different pH.
